# Supplementary material for: Proton delivery through a dynamic 3D H-bond network constructed from dense hydroxyls for advanced ion-selective membranes
Source: Royal Society of Chemistry journal article supplement (doi:10.1039/c9ta04423j), 2019-01-01
Supplement: c9ta04423j1.pdf [file c9ta04423j1.pdf]

## Supporting Information

### **Proton Delivery through Dynamic 3D H-bond Network Initiated by Dense Hydroxyls for Advanced Ion-selective Membrane**

Lei Hu,<sup>a</sup> Li Gao,<sup>a</sup> Xiaoming Yan,<sup>\*ab</sup> Wenji Zheng,<sup>a</sup> Yan Dai,<sup>b</sup> Ce Hao,<sup>a</sup> Xuemei Wu<sup>a</sup> and Gaohong He<sup>\*ab</sup>

<sup>a</sup>State Key Laboratory of Fine Chemicals, School of Petroleum and Chemical Engineering, Dalian University of Technology, 2 Dagong Road, Panjin, LN 124221, China

<sup>b</sup>Panjin Institute of Industrial Technology, Dalian University of Technology, 2 Dagong Road, Panjin, LN 124221, China

\*Corresponding authors: yanxiaoming@dlut.edu.cn (Dr. Xiaoming Yan); hgaohong@dlut.edu.cn (Dr. Gaohong He)

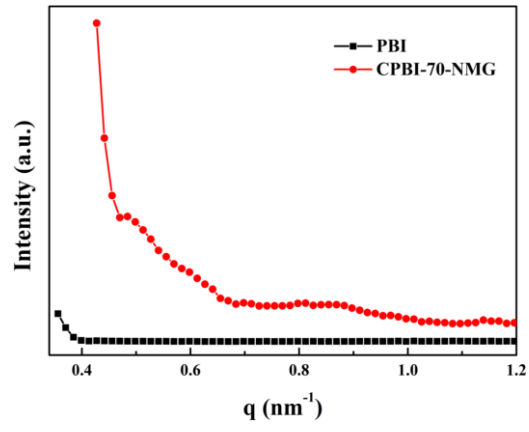

**Figure S1.** SAXS of PBI and CPBI-70-NMG membranes.

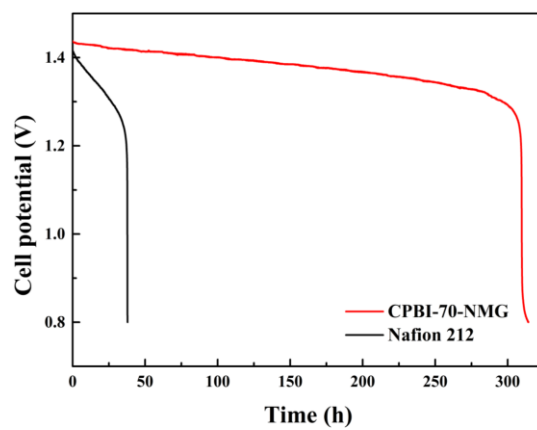

**Figure S2.** Self-discharge curves of VFB assembled with CPBI-70-NMG and Nafion 212 membranes.

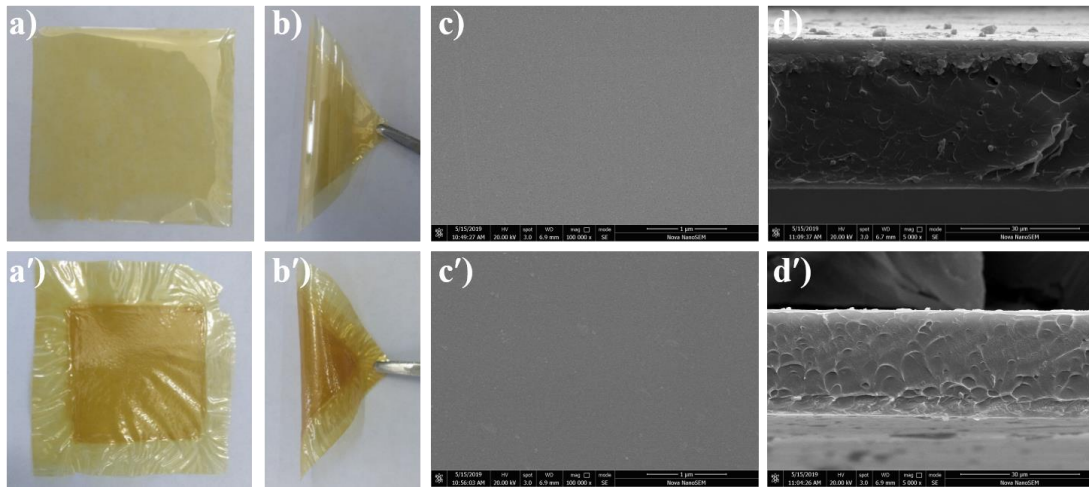

**Figure S3.** The morphological images. The pristine membrane: (a) flat and (b) folded digital photographs; (c) surface and (d) cross section of SEM images. The membrane after 800-time cycling charge-discharge test: (a') flat and (b') folded digital photographs; (c') surface and (d') cross section of SEM images.

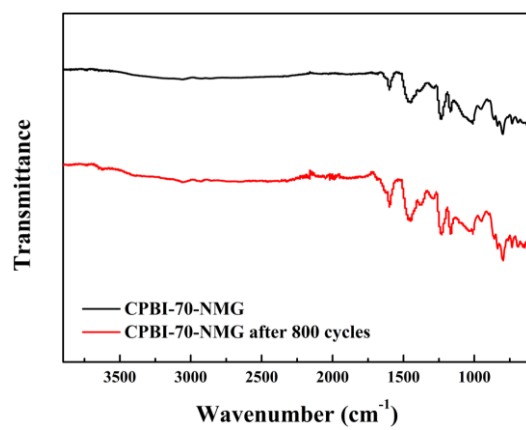

**Figure S4.** FTIR spectra of CPBI-70-NMG membranes before and after 800 charge-discharge cycles at 120 mA

cm<sup>-2</sup>.
